# Supplementary material
Source: Springer Nature journal article supplement (https://www.springermedizin.de/resource/supplementary/12891_2014_2378_MOESM1_ESM.pdf/9510074)
Supplement: MOESM1 [file 9510074]

Additional file 1

Form for validation of Rheumatoid Arthritis diagnosis in the Swedish national patient register and the Swedish Rheumatology Quality register (SRQ)

**Prevalent patients:** two visits at a rheumatologist listing an RA-diagnosis between 2005-2008

### The 1987 ACR classification criteria for rheumatoid arthritis

4 out of 7 criteria with symptoms at least 6 weeks is needed for classification of a patient as having RA

|                                                                                                         |  |
|---------------------------------------------------------------------------------------------------------|--|
| 1) Morning stiffness- at least 1 hour                                                                   |  |
| 2) Arthritis in at least 3 out of 14 joint areas(pip-, mcp-, wrist-, elbow-, knee-, ankle-, mtp-joints) |  |
| 3) Arthritis of hand joints(mcp-,pip-,wrists)                                                           |  |
| 4) Symmetric arthritis (mcp-, pip-, mtp-joints)                                                         |  |
| 5) Rheumatoid nodules                                                                                   |  |
| 6) Positive Serum Rheumatoid factor                                                                     |  |
| 7) Radiographic changes (typical of rheumatoid arthritis on posteroanterior hand and wrist radiographs) |  |
| 8) Fullfills criteria                                                                                   |  |

[illegible]

### The 2010 ACR-EULAR classification criteria for rheumatoid arthritis

Patient with at least one joint with definitive clinical synovitis.  $\geq 6$  points is needed for classification of a patient as having definite RA

|                                                                                                        |  |
|--------------------------------------------------------------------------------------------------------|--|
| <b>A. Joint involvement-</b> Refers to any swollen or tender joint on examination                      |  |
| DIP, CMC 1 and MTP- 1 joints excluded from assessment                                                  |  |
| 1 large joint (shoulder, elbow, hip, knee, ankle)                                                      |  |
| 2-10 large joints                                                                                      |  |
| 1-3 small joint (mcp, pip, mtp 2-5, wrist, ip-1)-with or without involvement of large joints           |  |
| 4-10 small joints- with or without involvement of large joints                                         |  |
| > 10 joints- at least one small joint(also including other joints ie. AC, SC)                          |  |
| <b>B. Serology</b> (at least 1 test result is needed for classification)                               |  |
| Negative RF <i>and</i> negative ACPA                                                                   |  |
| Low positive RF <i>or</i> low positive ACPA                                                            |  |
| High positive RF <i>or</i> high positive ACPA                                                          |  |
| <i>Low positive: IU values &gt; the ULN but &lt; 3 times the ULN .</i>                                 |  |
| <i>High positive: &gt; 3 times the ULN. If RF information only available as positiv=low positive</i>   |  |
| <b>C. Acute-phase reactants</b>                                                                        |  |
| Normal CRP <i>and</i> normal ESR                                                                       |  |
| Abnormal CRP <i>or</i> abnormal ESR                                                                    |  |
| <b>D. Duration of symptoms</b> (patient self-report of the duration of signs or symptoms of synovitis) |  |
| <6 weeks                                                                                               |  |
| >6 weeks                                                                                               |  |
| <b>E. Fulfills criteria</b>                                                                            |  |

Points

0

1

2

3

5

0

2

3

0

1

0

1

### Additional information

|                                                                                          |
|------------------------------------------------------------------------------------------|
| RA-diagnosis in the NPR(date when the RA-diagnosis was validated)                        |
| Included in the SRQ                                                                      |
| Erosive disease when listed as prevalent RA (based on hand and feet radiographs )        |
| Erosive disease 3 years after listed as prevalent RA(based on hand and feet radiographs) |
| Clinical RA                                                                              |
| Other diagnosis if not RA/co-morbidity/comment(based on the medical record in Take Care) |

date

| date |
|------|
|------|

|  |  |  |
|--|--|--|
|  |  |  |
|  |  |  |
|  |  |  |
